# Supplementary material for: Modeling the effects of strigolactone levels on maize root system architecture
Source: Frontiers journal article supplement (doi:10.3389/fpls.2023.1329556), 2024-01-11
Supplement: Data_Sheet_1.ZIP [file Data_Sheet_1.ZIP]

## Sheet: DIRT3D_Data
DIRT3D_Data
Youngest - 2nd youngest whorl distance	B101	B112	DKIB014	DKPB80X3IIH6	H96X3IIH6	LH59XPHG29	LH123HT	PA762	PA762X3IIH6	PHG50XPHG47	PHZ51	PHZ51XLH59		Variation_total	70.2398			standard deviation of all trait values	8.38092	whorl distance
	15.8717	37.4134	28.8745	26.5413	24.8978	32.8006	15.291	36.7672	16.9574	18.8555	15.6053	25.6687		Variance_avg	4.87785	H1	0.935064	average of all values	25.3243
	16.9574	33.0333	27.4758	25.4688	25.0121	36.6213	17.2257	38.8792	13.0147	17.3944	10.7857	27.4528			2.12421	RVP	14.3997	Ve = Error Mean Square	0.937015
	20.3936	39.3678	25.8853	26.5332	24.5575	35.8198	17.8923	35.351	15.9213	22.1885	11.323	26.0661						Vg	0.0511914
	13.0333	33.0299	26.1496	23.9513	26.3014	36.8801	16.5839	36.4381	13.3509	17.7869	12.2695	27.9268						Vp	0.0629041
	16.3165	38.268	29.3825	30.3473	26.211	33.9999	14.0196	39.2332	17.7037	17.7752	11.7043	27.3601						H2	0.813801
		37.7175		26.8628	28.3172			35.5825			10.8693
		33.8635		29.3622	27.3748			39.0853			16.1972
				28.2839	30.6363			30.3661			17.5076
				23.8903	27.2299			30.6399			16.9295
					29.0634			33.9777
Average	16.5145	36.0991	27.5535	26.8046	26.9601	35.2243	16.2025	35.632	15.3896	18.8001	13.6879	26.8949
Variance(S2)	6.95371	7.25858	2.4625	4.98066	3.87115	3.10526	2.4109	10.3162	4.47305	3.8843	7.8722	0.945725
standard deviation(s)	2.63699	2.69417	1.56923	2.23174	1.96752	1.76218	1.55271	3.21188	2.11496	1.97086	2.80574	0.972484

## Sheet: DIRT3D_Trait_Validation
DIRT3D_Trait_Validation
Genotype	DIRT/3D	Manual		Youngest - 2nd youngest whorl distance
B101-1	15.8717	19.1126		SUMMARY OUTPUT
B101-2	16.9574	17.3193
B101-3	20.3936	17.6347		Regression Statistics
B101-4	13.0333	15.3461		Multiple R	0.927028
B101-5	16.3165	14.0586		R Square	0.859381
B112-1	37.4134	40.6405		Adjusted R Square	0.857555
B112-2	33.0333	29.5328		Standard Error	3.34055
B112-3	39.3678	37.8565		Observations	79
B112-4	33.0299	27.7572
B112-5	38.268	39.2799		ANOVA
B112-6	37.7175	41.3099			df	SS	MS	F	Significance F
B112-7	33.8635	29.2086		Regression	1	5251.32	5251.32	470.58	1.54515e-34
DKIB014-1	28.8745	31.1304		Residual	77	859.264	11.1593
DKIB014-2	27.4758	30.5737		Total	78	6110.59
DKIB014-3	25.8853	27.9617
DKIB014-4	26.1496	25.0737			Coefficients	Standard Error	t Stat	P-value	Lower 95%	Upper 95%	Lower 95.0%	Upper 95.0%
DKIB014-5	29.3825	28.6617		Intercept	0.763929	1.21029	0.631198	0.529781	-1.64606	3.17392	-1.64606	3.17392
DKPB80X3IIH6-1	26.5413	29.6027		15.8717	0.980843	0.045215	21.6928	1.54515e-34	0.890808	1.07088	0.890808	1.07088
DKPB80X3IIH6-2	25.4688	21.6281
DKPB80X3IIH6-3	26.5332	32.8049
DKPB80X3IIH6-4	23.9513	21.5752
DKPB80X3IIH6-5	30.3473	27.3125		RESIDUAL OUTPUT
DKPB80X3IIH6-6	26.8628	23.7946
DKPB80X3IIH6-7	29.3622	33.3537		Observation	Predicted 19.1125917158263	Residuals
DKPB80X3IIH6-8	28.2839	25.521		1	17.3965	-0.0771371
DKPB80X3IIH6-9	23.8903	22.0911		2	20.7669	-3.13219
H96X3IIH6-1	24.8978	29.0041		3	13.5476	1.79853
H96X3IIH6-2	25.0121	30.3307		4	16.7678	-2.70921
H96X3IIH6-3	24.5575	28.9131		5	37.4606	3.17996
H96X3IIH6-4	26.3014	23.8752		6	33.1644	-3.63169
H96X3IIH6-5	26.211	27.8626		7	39.3775	-1.52106
H96X3IIH6-6	28.3172	34.4846		8	33.1611	-5.40389
H96X3IIH6-7	27.3748	28.1917		9	38.2988	0.981093
H96X3IIH6-8	30.6363	37.3192		10	37.7589	3.55102
H96X3IIH6-9	27.2299	30.878		11	33.9787	-4.77007
H96X3IIH6-10	29.0634	29.6801		12	29.0853	2.04513
LH59XPHG29-1	32.8006	27.5516		13	27.7134	2.8603
LH59XPHG29-2	36.6213	43.9659		14	26.1533	1.80842
LH59XPHG29-3	35.8198	37.5726		15	26.4126	-1.33887
LH59XPHG29-4	36.8801	32.1352		16	29.5835	-0.921825
LH59XPHG29-5	33.9999	30.1713		17	26.7967	2.80592
LH123HT-1	15.291	13.8053		18	25.7448	-4.11673
LH123HT-2	17.2257	14.2229		19	26.7889	6.01603
LH123HT-3	17.8923	18.8445		20	24.2564	-2.68116
LH123HT-4	16.5839	17.3104		21	30.5298	-3.2173
LH123HT-5	14.0196	15.2154		22	27.1121	-3.31746
PA762-1	36.7672	45.5636		23	29.5636	3.79007
PA762-2	38.8792	38.5215		24	28.506	-2.98502
PA762-3	35.351	31.5147		25	24.1965	-2.10548
PA762-4	36.4381	36.122		26	25.1848	3.81932
PA762-5	39.2332	37.664		27	25.2969	5.03385
PA762-6	35.5825	39.9543		28	24.8509	4.06215
PA762-7	39.0853	32.6683		29	26.5614	-2.68628
PA762-8	30.3661	26.2877		30	26.4728	1.38986
PA762-9	30.6399	25.642		31	28.5386	5.94595
PA762-10	33.9777	30.7248		32	27.6143	0.577451
PA762X3IIH6-1	16.9574	18.8955		33	30.8133	6.50588
PA762X3IIH6-2	13.0147	13.6565		34	27.4722	3.40582
PA762X3IIH6-3	15.9213	13.5254		35	29.2706	0.409496
PA762X3IIH6-4	13.3509	16.1847		36	32.9362	-5.38456
PA762X3IIH6-5	17.7037	21.4483		37	36.6837	7.28221
PHG50XPHG47-1	18.8555	17.3997		38	35.8975	1.67504
PHG50XPHG47-2	17.3944	15.4578		39	36.9375	-4.80226
PHG50XPHG47-3	22.1885	21.5137		40	34.1125	-3.94118
PHG50XPHG47-4	17.7869	15.4794		41	15.762	-1.95674
PHG50XPHG47-5	17.7752	19.1281		42	17.6597	-3.43679
PHZ51-1	15.6053	16.0131		43	18.3134	0.531085
PHZ51-2	10.7857	11.5684		44	17.0301	0.280303
PHZ51-3	11.323	10.5377		45	14.5149	0.700467
PHZ51-4	12.2695	14.3812		46	36.8268	8.73674
PHZ51-5	11.7043	12.2561		47	38.8983	-0.376874
PHZ51-6	10.8693	12.0112		48	35.4377	-3.92297
PHZ51-7	16.1972	13.4557		49	36.504	-0.381961
PHZ51-8	17.5076	17.7571		50	39.2455	-1.58155
PHZ51-9	16.9295	17.0907		51	35.6648	4.2895
PHZ51XLH59-1	25.6687	29.238		52	39.1004	-6.43217
PHZ51XLH59-2	27.4528	27.1226		53	30.5483	-4.26056
PHZ51XLH59-3	26.0661	27.9709		54	30.8168	-5.17485
PHZ51XLH59-4	27.9268	29.7479		55	34.0907	-3.3659
PHZ51XLH59-5	27.3601	33.05		56	17.3965	1.49908
				57	13.5293	0.127155
				58	16.3802	-2.85484
				59	13.859	2.32572
				60	18.1285	3.31983
				61	19.2582	-1.85848
				62	17.8251	-2.36728
				63	22.5274	-1.01372
				64	18.2101	-2.73077
				65	18.1986	0.929432
				66	16.0703	-0.0572087
				67	11.343	0.225434
				68	11.87	-1.33237
				69	12.7984	1.5828
				70	12.244	0.0121647
				71	11.425	0.586248
				72	16.6508	-3.19517
				73	17.9361	-0.178979
				74	17.3691	-0.278416
				75	25.9408	3.29714
				76	27.6908	-0.568167
				77	26.3307	1.64019
				78	28.1557	1.59225
				79	27.5999	5.4501
